# Supplementary material for: Molecular Cloning of the B4GALNT2 Gene and Its Single Nucleotide Polymorphisms Association with Litter Size in Small Tail Han Sheep
Source: MDPI journal article supplement (doi:10.3390/ani8100160), 2018-09-20
Supplement: s1 [file s1]

**Supplementary file 4: Six high similarity protein sequences of ovine B4GALNT2 for motifs detection**

>B4GALNT2\_Ovis aries, NP\_001305005.1

MTSFGSRYLWILKMS VLFLALGI VLFMFRS VSLYSEFSI YKAPLLQPS VAAGMLKLLPEKHI  
KSLFTHDGIWLF PKNQCKCEAW KLQQS YYFENAYGQTELP AVKMRRQAEFEHFQRREGL  
PRPPPLLAQANLPFGYPIHG VEV MPLHTIPIGLQFEGPD APIYKVT LKASLGT LNTLADTP  
DTVVQGRGQKELTILTSSRTVLNFILQHVT YTSTEYQHPRVD VVS LESNSS VAKFPVTIRFP  
VMPKLYDPGPERKLRNLVSIAT KTFLRPHKLKTM LQSIRVYYPDLT VI VADDS KEPLINDS  
YVEYYTMPY GKGWFAGRNLAISQ VTT KYVLW VDDDFLFNDKT KIEVLVD VLEKTELDV  
VGGS VLG NVFQF KLFLEHS KNGDCLHRRTGSFGPLDGF PNCVVTSGVVNFFLAHTERLQR  
VGFDPR LHRVAHSEFFIDGLGSL LVGSCSD VIIGHQPHSS VADPELA ALEKT YRRYRANTN  
DKVQFKLALHYFKNHLQCTT

>B4GALNT1\_Rattus norvegicus, AAH81799.1

MRLDRRALYALVLLACASLG LLYASTRDAPGLPNPLALWSP PQGPPRLDLLDLATEPRYA  
HIPVRIKEQVVGLLAQNNCSCCESSGGRFALPFLRQ VRAIDFTKA FDAEELRAVSISREQEYQ  
AFLARSRLADQLLIAPANSPLQYPLQG VEVQPLRSILVPGLSLQEAS VQEIYQVNLIASLG  
TWDVAGEVTGVTLTGEGQSDTLASPILD KLN RQLQLVTYSSRS YQANTADT VRFSTKGH  
EVAFTILIRHPPNPRLYPPSSLPQGAQYNISALVT VATKTFLRYDRLRALIASIRRFYPTVTIVI  
ADDS DKPERISDPHVEHYFMPFGK GWFAGRNLA VSQVTTKYVLW VDDDFVFTARTRLEK  
LVDVLERTPLDLVGGAVREISG YATTYRQLLS VEPGAPGFGNCLRQKQGFHHEL AGFPNC  
VVTDG VVNFFLARTDKVRQVGFDPR LNRVAHLEFFLDGLGSLRVGSCSDVVVDHASKVK  
LPWTSKDPGAELYARYRYPGSLDQSQVAKHRL LFFKHRLQCMTAE

>B4GALNT1\_Mus musculus, AAH57199.1

MRLDRRALYALVLLACASLG LLYSSTRNAPSLPNPLALWSP PQGPPRLDLLDLAPEPRYA  
HIPVRIKEQVVGLLAQNNCSCESKGGSLPLPFLRQ VRAVDLTKA FDAEELRAVS VAREQEY  
QAFLARSRLADQLLIAPANSPLQYPLQG VEVQPLRSILVPGLSLQEAS VQEIYQVNLSASL  
GTWDVAGEVTGVTLTGEGQPDLT L ASPVLD KLN RQLQLVTYSSRS YQANTADT VRFSTK  
GHEVAFTILVRHPPNPRLYPPSSLPQGA EYNISALVTIATKTFLRYDRLRTLIASIRRFYPTVTI  
VIADDS DKPERISDPHVEHYFMPFGK GWFAGRNLA VSQVTTKYVLW VDDDFVFTARTRL  
EKLVDVLEKTPLDLVGGAVREISG YATTYRQLLS VEPGAPGLGNCFRQKQGFHHEL VGFPSC  
CVTDG VVNFFLARTDKVRQVGFDPR LNRVAHLEFFLDGLGFLRVGSCSDVVVDHASKV  
KLPWTAKDPAET YARYRYPGSLDQSQVAKHRL LFFKHRLQCMTAE

>B4GALNT2\_Homo sapiens, NP\_703147.2

MGSAGFSVGKFHVEVASRGRECVSGTPECGNRLGSAGFGALCLELRGADPAWGPFAAHG  
RSRRQGS RFLWLLKILVIILVLGIVGFMFGSMFLQAVFSSPKPELPSPAPGVQKLKLLPEERL  
RNLFSDGIWLF PKNQCKCEANKEQGGYNFQDAYGQSDLP AVKARRQAEFEHFQRREGL  
PRPLPLLVQPNLPFGYPVHG VEV MPLHTVPIGLQFEGPDAP VYEVTLTASLGT LNTLADV  
PDSVVQGRGQKQLIISTDRKLLKFILQHVT YTSTGYQH QKVDIVSLESRSS VAKFPVTIRH  
PVIPKLYDPGPERKLRNLVTIATKTFLRPHKLMIM LRSIREYYPDLT VI VADDSQKPLEIKDN  
HVEYYTMPFGK GWFAGRNLAISQ VTTKYVLW VDDDFLFNEET KIEVLVD VLEKTELDVV  
GGSVLG NVFQFKLLLEQSENGACLHKRMGFFQPLDGF PSCVVTSGVVNFFLAHTERLQRV  
GFDPR LQRVAHSEFFIDGLGTLLVGSCPEVIIGHQSRSPVVDSELA ALEKT YNTYRSNTLTR  
VQFKLALHYFKNHLQCAA

>B4GALNT2\_Mus musculus, NP\_032107.1

MTSSVSFASFRFPWLLKTFVLMVGLATVAFMVRKVSLTTDFSTFKPKFPEPARVDPVLKLL  
PEEHLRKLFTYSDIWLFPPKNQCDNSGKLRMKYKFQDAYNQKDLPAVNARRQAEFEHFQ  
RREGLPRPPPLLAPPNLPFGYPVHGVEVMPLHTILIPGLQYEGPDAPVYEVILKASLGTNLNT  
LADVPDDEVQGRGQRQLTISTRHRKVLNFILQHVTYTSTEYYLHKVDTVSMEYESSVAKF  
PVTIKQQTVPKLYDPGPERKIRNLVTIATKTFLRPHKLKILLQSIRKYYPDITVI VADDSKEPL  
EINDDYVEYYTMPFGKGWFAGRNLAISQVTTKYVLWVDDDFLFSDKTKIEVLVDVLEKT  
ELDVVGGSVQGNTYQFRLLYEQTKNGSCLHQRWGSFQALDGFPGCTLTSGVVNFFLAHT  
EQLRRVGFDPIQRVAHGEFFIDGLGRLLVGSCPGVIINHQVRTPPKDPKLA ALEKTYDKY  
RANTNSVIQFKVALQYFKNHLYCST

>B4GALNT1\_Homo sapiens, NP\_001469.1

MWLGRRALCALVLLACASLGLLYASTRDAPGLRLPLAPWAPPQSPRRPELPDLAPEPRYA  
HIPVRIKEQVVGLLAWNNCSCCESSGGGLPLPFQKQVRAIDLTKAFDPAELRAASATREQEF  
QAFLSRSQSPADQLLIAPANSPLQYPLQGVEVQPLRSILVPGLSLQAASGQEVYQVNLTASL  
GTWDVAGEVTGVTLTGEGQADLTLVSPGLDQLNRQLQLVTYSSRSYQTN TADTVRFSTEG  
HEAFTIRIRHPPNPRLYPPGSLPQGAQYNISALVTIATKTFLRYDRLRALITSIRRFYPTVTV  
VIADDSDKPERVSGPYVEHYLMPFGKGWFAGRNLAVSQVTTKYVLWVDDDFVFTARTRL  
ERLVDVLERTPLDLVGGAVREISGFATTYRQLLSVEPGAPGLGNCLRQRRGFHHELVGFPG  
CVVTDGVVNFFLARTDKVREVGFDPRLSRVAHLEFFLDGLGSLRVGSCSDVVVDHASKLK  
LPWTSRDAGAETYARYRYPGSLDESQMAKHRLFFKHRLQCMTSQ
