# Supplementary material for: Molecular Cloning of the B4GALNT2 Gene and Its Single Nucleotide Polymorphisms Association with Litter Size in Small Tail Han Sheep
Source: MDPI journal article supplement (doi:10.3390/ani8100160), 2018-09-20
Supplement: s1 [file s1]

Supplementary file 1 Sequences of the primers used in the amplifications

| Primers | Primer sequence (5'-3')                                  | Usage                                       |
|---------|----------------------------------------------------------|---------------------------------------------|
| P1      | F: CCTCAACAAAGGCTGGTTCA<br>R: GCATGGCATGTGATAGGGAC       | g.36938224T>A detection                     |
| P2      | F: TGCTCCGGGGTGTTCCTCC<br>R: CTCTGCAGTGTGTTGGTGTGTC      | g.37034573A>G detection                     |
| P3      | F: CCGACCACCCATTCTTCT<br>R: GGTTTGCTTTCCTGGTGTGT         | DLX3:c.*803A>G detection                    |
| P4      | F: TCAGCATCTACAAAGCACCACTC<br>R: TCACATTCACAATCAGCACAGGT | g.36971115C>T detection                     |
| P5      | F: TTTAGCACCACCAGAGTTTGAGG<br>R: ACCCAAACAGAGGCAACACAG   | g.36946470 C>T,<br>g.36946465 G>A detection |
| P6      | F: GCATTTAGTCTTGCGCTCTCG<br>R: GCTGGTGGTGTTCCTTCTGGGT    | g.36942215T>C detection                     |
| P7      | F: AAACCTCAGAATGACGCAAG<br>R: TCAGAGGAGAATCCACACCC       | g.36933082C>T,<br>g.36933070G>A detection   |
| P8      | F: TGGCAGTGTGCTTGGAATGT<br>R: AAGTAGGAACAGCCTGACGGA      | g.36930089T>G detection                     |
| P9      | F: ACCACTCCTTCAGCCTAGTG<br>R: TCATCGTCCACCCAGAGAAC       | <i>B4GALNT2</i> -conservative<br>sequence   |
| P10     | F: CAGACTGAACTCCCTGCGGTGA<br>R: CACATCCAGTTCGGTCTTCTC    | <i>B4GALNT2</i> -conservative<br>sequence   |
| P11     | F: AAGATTGAGGTGCTGGTGGA<br>R: TGCCCTGATCAGTGATTGGT       | <i>B4GALNT2</i> -conservative<br>sequence   |
| P12     | F: CAGCCCTGGAGAAGACCTAC<br>R: CCCACGCTCTGATCCTCTAA       | <i>B4GALNT2</i> -conservative<br>sequence   |
| P13     | F: CTTGAGGAAGTGGCAGTCTG<br>R: GCCACTGCGCTTACAAAGTA       | <i>B4GALNT2</i> -conservative<br>sequence   |
| P14     | F: ATGGGATGCAAGAAGGTGGA<br>R: TTTTGACCTACCGTGGCTGT       | <i>B4GALNT2</i> -conservative<br>sequence   |
| 5'GP1   | AGAGGCTCTTGATGTGTTTCTCAGGGAG                             | <i>B4GALNT2</i> - 5'RACE                    |
| 5'GP2   | CCCAGGGCCAAGAATAAGACGGACATC                              | <i>B4GALNT2</i> - 5'RACE                    |
| 3'GIP   | TGGGATGCAAGAAGGTGGAGGGCAGAG                              | <i>B4GALNT2</i> - 3'RACE                    |
| 3'GOP   | GATTCTCCCACTGCTGCGCTGCCTTTT                              | <i>B4GALNT2</i> - 3'RACE                    |
| P15     | F: CCTGAAAGCTTCTCTGGGGA<br>R: CCGGCTACTGGTCAAAATGG       | <i>B4GALNT2</i> - qRT                       |
| P16     | F: CCAACCGTGAGAAGATGACC<br>R: CCCGAGGCGTACAGGGACAG       | $\beta$ -actin - qRT                        |
