# Supplementary material for: Molecular Cloning of the B4GALNT2 Gene and Its Single Nucleotide Polymorphisms Association with Litter Size in Small Tail Han Sheep
Source: MDPI journal article supplement (doi:10.3390/ani8100160), 2018-09-20
Supplement: s1 [file s1]

**Supplementary file 5: Homologous mRNA sequences of ovine B4GALNT2 for phylogenetic tree construct**

>B4GALNT2\_Ovis aries, NM\_001318076.1

GGCTGGACAATCGGCTGGGAGGCTGCCCCGGCTCCACCAGCCCAGGGCGTCCGAGGCG  
GCGGGATTCGTGATGACTTCGTTCGGCTCTAGATATCTGTGGATCCTCAAGATGTCCGT  
CTTATTCCTGGCCCTGGGCATTGTATTATTTATGTTTCAGAAAGTGTGTCCCTGTATTCAGAA  
TTCAGCATCTACAAAGCACCCTCCTTCAGCCTAGTGTGGCTGCCGGAATGCTGAAGC  
TTCTCCCTGAGAAACACATCAAGAGCCTCTTTACCCACGATGGAATCTGGCTCTTCCCG  
AAAAACCAGTGCAAATGTGAAGCCTGGAACTTCAGCAAAGCTATTACTTTGAAAATG  
CTTATGGCCAGACTGAACTCCCTGCGGTGAAAATGAGGAGACAAGCTGAATTTGAACA  
CTTTCAGAGAAGAGAAGGGCTGCCTCGCCCACCGCCCCTGCTGGCTCAGGCCAACCT  
CCCCTTTGGGTACCCTATCCACGGGGTGGAAAGTGATGCCCTGCACACAATTCCCATCC  
CAGGTCTCCAGTTTGAAGGACCAGACGCTCCCATCTATAAGGTCACCCTGAAAGCTTC  
TCTGGGGACACTGAACACCCTCGCTGACACCCAGACACTGTGGTGCAGGGCAGAGG  
CCAGAAGGAGCTGACCATTTTGACCAGTAGCCGGACGGTTTTGAATTCATCCTCCAG  
CACGTGACATACACCAGCACAGAGTACCAGCACCCCAGGGTGGATGTGGTGAGTCTG  
GAGTCCAACCTCCTCAGTGGCCAAGTTTCCAGTGACCATCCGCTTTCCTGTTATGCCTAA  
GTTATATGACCCTGGACCAGAGAGGAAGCTCAGAAACCTGGTGTCCATTGCCACCAA  
ACTTTCCTCCGTCCCCACAAGCTCAAGACCATGCTCCAGAGCATTCGTGTGTATTACCC  
AGACTTGACCGTGATCGTCGCTGATGACAGCAAGGAGCCCCTGGAAATTAATGACAGC  
TACGTGGAGTATTACACCATGCCCTACGGCAAGGTTGGTTTGCTGGTAGGAACCTGG  
CCATATCTCAGGTTACCACCAAATACGTTCTCTGGGTGGACGATGACTTTCTCTTCAATG  
ACAAGACCAAGATTGAGGTGCTGGTGGATGTCCTAGAGAAGACCGAACTGGATGTGG  
TAGGTGGCAGTGTGCTTGGAATGTGTTCCAGTTTAAAGCTGTTCTTGAGCACAGCAA  
GAATGGGGACTGTCTCCATCGGCGGACAGGATCTTTCGGGCCCCTGGACGGCTTCCCC  
AACTGCGTGGTGACCAGCGGCGTCGTTAACTTCTTCCTGGCCCACACAGAGCGGCTCC  
AAAGAGTTGGCTTTGACCCCCGCCTGCATCGAGTGGCTCACTCAGAGTTCTTTATTGAT  
GGGCTCGGGAGTCTGCTCGTGGGGTCTGCTCAGATGTGATTATAGGTCACCAGCCCC  
ATTCTTCAGTGGCGGACCCAGAGCTGGCAGCCCTGGAGAAGACCTACCGCAGATACCG  
GGCCAACACCAATGATAAGGTCCAGTTCAAGCTAGCTCTCCACTACTTCAAGAACCAT  
CTCCAATGTACCACATAAAGATGCTTGGACTTTGGCAGAGTGCTAGGTCTGGCTCAGTT  
ACTGTAGGTCATTAGAAATGGACCAATCACTGATCAGGGCAATGGCGATTGTATTAATA  
ATAATTATTGTTTGGTGTCTTACCATTGTTGGAATCACTGTACACACCTGATATGAAGAGC  
TGACCCATTAGAAAAGACCCTAACGCTGGGAAAGATGGAAGGCAGGAGGAGAAGGG  
GACGACAGAGGATGAGATGGTTAGATGGCATCACCGACTCGATGGACATGAGTTTGGG  
TAAACTCCGGGAGTTTGCTGCGGTTTCATGGGGTCACAAAGAGCTGGACACGACAGAG  
TGACTGAACTGTACAAGTGAAGTGTACATATAATGGTGGTGGTGGTGGTTTGGCAATA  
AGTCGTGTCCAACCTTCGTCTCACATCATCTCATGCAAAGAGCACATGATGGACTGGT  
ATCCTTGATCAAAGGATCAAAGGATCGGTATCCTCTGGGTCTTGAGAGTTATTGG  
TGGGTGTTACATCACAGATCATCTCTAGCATCAACT

>B4GALNT2\_Capra hircus, NM\_001314262.1

ATGACTTCGTTCGGCTCTAGATATCTGTGGATCCTCAAGATGTCCGTCTTATTCTTGGCC  
CTGGGCATTGTATTATTTATGTTTCAGAAAGTGTGTCCCTGTATTCAGAAATTCAGCATCTAC  
AAAGCACCCTCCTTCAGCCTAGTGTGGCTGCCGGAATGCTGAAGCTTCTCCCTGAGA

AACACATCAAGAGCCTCTTTACCCACGATGGAATCTGGCTCTTCCCGAAAAACCAGTG  
CAAATGTGAAGCCTGGAACTTCAGCAAAGCTACTACTTTGAAAATGCTTATGGCCAA  
ACTGAACTCCCTGCGGTGAAAATGAGGAGACAAGCTGAATTTGAACACTTTTCAGAGA  
AGAGAAGGGCTGCCTCGCCACCGCCCCTGCTGGCTCAGGCCAACCTCCCCTTTGGGT  
ACCCCATCCACGGGGTGGAAAGTGATGCCCCTGAACACAATTCCCATCCCAGGTGTCCA  
GTTTGAAGGACCAGACGCTCCCATCTATAAGGTCACCCTGAAAGCTTCTCTGGGGACA  
CTGAACACCCTCGCTGACACCCAGACACTGTGGTGCAGGGCAGAGGCCAGAAGGAG  
CTGACCATTTTGACCAGTAGCCGGACGGTTTTGAATTCATCCTCCAGCACGTGTCATA  
CACCAGCACAGAGTACCAGCACCCAGGGTGGATGTGGTGAAGTCTGGAGTCCAACCTC  
CTCAGTGGCCAAGTTTCCAGTGACCATCCGCTTTCCTGTTATGCCTAAGTTATATGACCC  
TGGACCAGAGAGGAAGCTCAGAAACCTGGTGTCCATTGCCACCAAACTTTCCCTCCGT  
CCCCACAAGCTCAAGACCATGCTCCGGAGCATTCGTGAGTATTACCCAGACTTGACTG  
TGATCGTGGCTGATGACAGCAAGGAGCCCCTGGAAATTAATGACAGCCATGTGGAGTA  
TTACACCATGCCCTACGGCAAGGGTTGGTTTGCCGGTAGGAACCTGGCCATATCTCAGG  
TCACCACCAAATACGTTCTCTGGGTGGACGATGACTTTCTCTTCAATGAGAAGACCAA  
GATTGAGGTGCTGGTGGATGTCCTAGAGAAGACCGAACTGGATGTGGTAGGTGGCAGT  
GTGCTTGGAATACGTTCCAGTTTAAGCTGTTCTTGAGCACACTAAGAATGGGGACT  
GTCTCCATCGGCGGACAGGATCTTTCGGGCCCCTGGATGGCTTCCCCAACTGCGTGGT  
GACCAGCGGTGTCGTTAACTTCTTCTGGCCACACAGAGCGGCTCCAAAGAGTTGGC  
TTTGACCCCGCCTGCAGCGAGTGGCTCACTCAGAGTTCTTTATTGATGGGCTCGGGA  
GTCTGCCCCGTGGGGTCTGCTCAGATGTGATTATAGGTCACCAGCCCCATTCTTCAGTG  
GCGGACCCAGAGCTGGCAGCCCTGGAGAAGACCTACGGCAGATACCGGGCCAACACC  
AATGATAAGGTCCAGTTCAAGCTAGCTCTCCACTACTTCAAGAACCATCTCCAATGTAC  
CACATAA

>B4GALNT2\_Bos taurus, XM\_010816190.2

CTACCCCGGGTTGGTGCCTAGGGCTGGACAATCGGCTGGGAGGCTGCCGGGCTCCACC  
AGCCAGGGCGTCCGAGGCGGCGGGATTCATGATGACTTCGTTGGGCTCTAGATATCTG  
TGGATCCTCAAGATGTCCGTCTTATTCTTGCCCTGGGCATTGTGTTATTTATGTTTCAGA  
AGTGTGTACCTGTATTCAGAAATCAGCAGCTACAAAGCACCACTCCTTCAGCCTAGTCC  
GGCTGCCGGAATGTTGAAGCTTCTCCCTGAGGAACATATCAAGACCCTCTTTACCCAC  
GATGGAATCTGGCTCTTCCCGAAAAACCAGTGCAAATGTGAAGCCTGGATACATCGGC  
AAAGATATAACTTTGAAAATGCCTATGACCAGACTGACCTCCCTGCGGTGAAAATGAG  
GAGACAAGCTGAATTTGAACACTTTTCAGAGGAGAGAAGGGCTGCCTCGCCACCAACC  
CCTGCTGGCTCAGGCCAACCTCCCCTTTGGGTACCCGGTCCACGGAGTGGAGGTGATG  
CCCCTGCACACAATTCCCATCCCGGGTCTCCAGTTTGAAGGACCAGACGCTCCCATCTA  
TAAGGTCACCCTGAAAGCTTCTCTGGGGACACTGAACACCCTCGCTGACACCCAGAC  
AGTGTGGTGCAGGGCCGAGGCCAGAAGCAGCTGACCATTTTGACCAGTAGCCGGAAG  
GTTTTGAATTCATCCTCCAGCACGTGACATACACCAGCACAGAGTACCAGCACCA  
GGGTGGATGTGGTGAAGTCTGGAGTCCAACCTCCTCAGTGGCCAAGTTTCCAGTGACCAT  
CCGCTTTCCTGTTATGCCTAAGTTATACGACCCTGGACCAGAGAGGAAGCTCAGAAAC  
CTGGTGTCCATTGCCACCAAACTTTCCCTCCGTCCCCACAAGCTCATGACCATGCTCCA  
GAGCATTCGTGAGTATTACCCAGACTTGACCGTGATCGTGGCTGATGACAGCAAGGAG  
CCCCTGAAAATTAATGACAGCCATGTGGAGTATTACACCATGCCCTACGGCAAGGGTTG  
GTTTGCTGGTAGGAACCTGGCCATATCTCAGGTCACCACCAAATACGTTCTCTGGGTGG

ACGATGACTTTCTCTTCAATGACAAGACCAAGATTGAGGTGCTGGTGGATGTCCTAGA  
GAAGACCGAACTGGATGTGGTAGGTGGCAGTGTGCTTGGAAATATGTTCCAGTTTAAG  
CTGTTCTTGAGCACAGTAAGAACGGGACTGTCTCCATCGGCGGACAGGATCTTTCG  
GGCCCTGGACGGCTTCCCCAACTGCGTGGTGACCAGCGGCGTTGTAACTTCTTCCT  
GGCCCACACAGAGCGGCTCCAAAGAGTTGGCTTTGACCCCCGCCTGCAGCGAGTGGC  
TCACTCAGAGTTCTTTATTGATGGGCTCGGGAGTCTGCTCGTGGGGTCTGCTCAGATG  
TGATTATAGGTCACCAGCCGCATTCTCCAGTGGAGGACCCAGAGCTGGCAGCCCTGGA  
GAAGACCTACCGCATATACCGGGCCAACACCAATGATAAGATCCAGTTCAAGCTAGCTC  
TCCACTACTTCAAGAACCACCTCCAATGTGCCACATAAAGATGCCTGGACTTCGGCAA  
AGTGCTAGGTCTGGCTCAGTTACTGTAGGTCATTAGAAATGGACCAATCACTGATCAGA  
ACAATGGCAACTATATTAATAATAATTATTGTTTGATGTCTTACCATTTGTGAATCACTGT  
ACACACCTGATGTGAAGAGCTGACTCGTTTGAAAAGGCCCAATGCTGGGAAAGATT  
GAAGGCAGGAAGAGAAGGGGACGACAGAGGATGAGATGGTTAGATGGCACCACCAA  
CTCAATGGACATGAGTTTGGGTAACTGTGGAAGTCGGTGATGGACTGGGAGGCCTGG  
TGTGCTGCGGTTCTGTTGGGCTCGCAAAGAGTTGGACACAACCTGAGTGAAGTGA  
CTGAAGTGTACATATAATGGTGGTGGTGGTGGTTTAGGCAATAAGTCGTGTCCAGCTTT  
TGAATCACATTATCTCATGCAAAAGAGCACATGATGGATTGGTATCCTTGATCAAAAGG  
ATCAAAAGGATTGGTATCCTTCTGGGTCCTTGAGGGTTATTGGTGGGTATTACATCACA  
GATCATCTCTAGCGTCAACTGTCATCCACAAATTTTATTGGTCATACTTTGTGGACTC  
AAATAATGTGAATAACCCAGAGTCCTTACCTTGAGGAAGTGGCAGTCTGGTTCAGTTCA  
TTCCACTAGTAGCATTGGGCAGCCAGGCTCAGAGGATCAGAGTGGGGAGAACTTACAA  
GGGCCCATGCAGGTGAGGAGGGCTCTGTGGAGTCAGCTTACCTGCAGTCCAGCACATG  
GATGGGATCCAGGAAAGTGGAGGGCAGAGATCACTGGGTAGTCCACTCACTGCTGGA  
ATAAAGCTTTCCTGGCATTAGATACTTACCATAAAGACACATTCCAGAATGCTTGGGAT  
TGAAGTTGGACCTTGTAAGCGCTGTGGCCAAGCCACTAAATCCAGTTGCTT  
ACTACTCAAGACTGCCATTGTCTGCAGAATGGAGCCATGGTGATGACGCGGGTTTTCTC  
TGTCACCTTGGGAGTCAGTGGATTCTCCCACTGCTGCGCTGCCTTTTTGTTTCCACTCT  
TTCCTACTGAAGACAGCCACGGTAGTTCAAAATCTCTGAAAAATGTGTGAGATGTTAAT  
TCATGAAAAACGTTTTGGTTCTCAAATAATTTTAAAAATACTGCATGCTCTATCTCCCT  
CTTTGACAATCACAAATTCATATTAGTATATTCAAGGCTCTGAGAAGTCCTGCTGTGAAG  
AAATTGACTTAACGTCAATTCAGTATTTCTCAGATATGGATACAGACTGGCCATCATTTT  
TTTTGTTCTCCTGAACACAAATAAAGCACATACCTCATTCATTGTA

>B4GALNT2\_Homo sapiens transcript variant 1, NM\_153446.2

ATAGGTGGCTGCAGAGGCGAGGTGACGGCGCGTGCGGAACGAACCTCTGCACCCCCAG  
GAATGGGGAGCGCTGGCTTTTCCGTGGGAAAATTCCACGTGGAAGTGGCCTCTCGCGG  
CCGGGAATGTGTCTCGGGGACGCCCAGTGTGGGAATCGGCTCGGGAGTGCGGGCTT  
CGGGGCTCTCTGCTTGGAACCTCAGAGGCGCTGACCCAGCCTGGGGCCCGTTTGCTGCC  
CACGGGAGGAGCCGCCGTCAGGGCTCGAGATTTCTGTGGCTCCTCAAGATATTGGTCA  
TAATCCTGGTACTTGGCATTGTTGGATTTATGTTTCGGAAGCATGTTCCCTTCAAGCAGTGT  
TCAGCAGCCCCAAGCCAGAACTCCCAAGTCCTGCCCCGGGTGTCCAGAAGCTGAAGC  
TTCTGCCTGAGGAACGTCTCAGGAACCTCTTTTCTACGATGGAATCTGGCTGTTCCCG  
AAAAATCAGTGCAAATGTGAAGCCAACAAAGAGCAGGGAGGTTACAACCTTTCAGGAT  
GCCTATGGCCAGAGCGACCTCCCAGCGGTGAAAGCGAGGAGACAGGCTGAATTTGAA  
CACTTTCAGAGGAGAGAAGGGCTGCCCCGCCCACTGCCCTGCTGGTCCAGCCCAAC

CTCCCCCTTTGGGTACCCAGTCCACGGAGTGGAGGTGATGCCCCCTGCACACGGTTCCCA  
TCCCAGGCCTCCAGTTTGAAGGACCCGATGCCCCCGTCTATGAGGTACCCCTGACAGC  
TTCTCTGGGGACACTGAACACCCCTTGCTGATGTCCCAGACAGTGTGGTGCAGGGCAGA  
GGCCAGAAGCAGCTGATCATTTCTACCAGTGACCGGAAGCTGTTGAAGTTCATTCTTC  
AGCACGTGACATACACCAGCACGGGGTACCAGCACCAAGAAGGTAGACATAGTGAGTC  
TGGAGTCCAGGTCCTCAGTGGCCAAAGTTTCCAGTGACCATCCGCCATCCTGTCAATCCC  
AAGCTATACGACCCTGGACCAGAGAGGAAGCTCAGAAACCTGGTTACCATTTGCTACCA  
AGACTTTCCTCCGCCCCACAAGCTCATGATCATGCTCCGGAGTATTCGAGAGTATTAC  
CCAGACTTGACCGTAATAGTGGCTGATGACAGCCAGAAGCCCCTGGAAATTAAAGACA  
ATCACGTGGAGTATTACACTATGCCCTTTGGGAAGGGTTGGTTTGCTGGTAGGAACCTG  
GCCATATCTCAGGTCACCACCAAAATACGTTCTCTGGGTGGACGATGATTTTCTCTTCAA  
CGAGGAGACCAAGATTGAGGTGCTGGTGGATGTCCTGGAGAAAACAGAACTGGACGT  
GGTAGGCGGCAGTGTGCTGGGAAATGTGTTCCAGTTTAAGTTGTTGCTGGAACAGAGT  
GAGAATGGGGCCTGCCTTCACAAGAGGATGGGATTTTCCAACCCCTGGATGGCTTCC  
CCAGCTGCGTGGTGACCAGTGGCGTGGTCAACTTCTTCTGGCCCCACACGGAGCGACT  
CCAAAGAGTTGGCTTTGATCCCCGCTGCAACGAGTGGCTCACTCAGAATTCTTCATT  
GATGGGCTAGGGACCCTACTCGTGGGGTTCATGCCAGAAAGTGATTATAGGTACCACT  
CTCGGTCTCCAGTGGTGGACTCAGAACTGGCTGCCCTAGAGAAGACCTACAATACATA  
CCGGTCCAACACCCTCACCCGGGTCCAGTTCAAGCTGGCCCTCCACTACTTCAAGAAC  
CATCTCCAATGTGCCGCATAAAGGTGTGAGGGCATAGGAGAAACACTAGGCTGGCTGG  
TTATGGTATCTATAGCAGGCCACCAAAAAGTGGACTCCTGATAGGTGAACGTTGTACCA  
AACCAGCTGGTGGGTAGGGAAAAGGGAAATGGCTCAGTTACTGGAAGTACCAATCAA  
AGGTGAAGGGTCACTGGAAATGAACCAGTCACTGACCAGGGCAATGGAGACTGTATT  
AATAGCAATGATGATTTGTACAATGCCCTGCCTTTTTTTGAAGCATTGTGCAT

>B4GALNT2\_Mus musculus, NM\_008081.3

CTGCGGTAGGCAGTCTGCAGAAAGTGGCTGGAGCGAGCTGCGATGACTTCCAGCGTGT  
CTTTTGCCAGCTTCAGGTTTCCATGGCTCCTCAAGACATTTGTCCTCATGGTAGGACTT  
GCCACTGTTGCGTTTATGGTGAGAAAGGTGTCCCTTACAACAGACTTCAGCACCTTCA  
AGCCAAAGTTTCCAGAGCCTGCAAGGGTTGACCCAGTGCTGAAGCTTCTACCAGAGG  
AGCATCTGAGGAAACTCTTTACCTACAGTGACATCTGGCTCTTCCCCAAAATCAGTGT  
GACTGTAACCTCTGGCAAACTGCGAATGAAATATAAGTTTTCAGGATGCCTATAACCAGAA  
GGACCTTCCAGCTGTGAATGCCAGAAGACAGGCAGAAATTTGAGCACTTTCAGAGGAG  
AGAAGGGGCTGCCTCGCCCACCACCTCTGCTGGCTCCACCCAATCTCCCCTTCGGATAC  
CCAGTCCATGGTGTGGAGGTGATGCCCTGCATACAATTCTCATCCAGGCCTCCAGTA  
TGAAGGGCCAGATGCTCCAGTCTATGAGGTATCCTGAAAGCTTCTCTGGGGACACTG  
AACACCCTTGCTGATGTGCCAGATGATGAGGTTTCAGGGCAGAGGCCAGAGGCAGCTG  
ACCATTTCCACCAGACATCGGAAGGTCTGAATTTATCCTTCAGCATGTGACGTACAC  
CAGCACAGAGTACTATCTCCACAAGGTGGACACAGTAAGTATGGAATACGAGTCGTCA  
GTGGCCAAAGTTTCCAGTGACTATCAACAACAGACTGTACCCAAGTTGTATGACCCTG  
GACCTGAGAGGAAGATCAGAAACCTGGTGACCATTGCCACGAAGACTTTTCTCCGTCC  
CCACAAGCTTAAGATCCTGCTTCAGAGTATTCGAAAATATTACCCAGACATCACCGTGA  
TTGTAGCTGATGACAGCAAGGAGCCCCTGGAAATTAATGATGACTACGTGGAGTACTA  
CACCATGCCCTTTGGGAAGGGCTGGTTTGCTGGGAGGAACCTGGCCATCTCACAGGTG  
ACTACTAAATATGTCCTCTGGGTGGACGATGACTTTCTCTTCAGCGACAAGACCAAGAT

TGAGGTACTGGTGGATGTCCTGGAGAAAACCGAACTGGATGTGGTGGGTGGCAGCGT  
GCAGGGGAATACTTACCAGTTCAGGCTGCTGTATGAACAGACCAAGAATGGGAGCTGT  
CTTCACCAGAGGTGGGGATCATTCCAGGCCCTTGACGGCTTTCCCGGATGCACGTTGA  
CCAGCGGCGTGGTGAACCTTCTTCTTGGCTCACACGGAACAACCTCCGAAGAGTTGGTTT  
TGATCCCATCTTGCAACGAGTGGCCACGGAGAGTTCTTTATTGATGGGCTGGGGAGA  
CTGTTGGTGGGCTCTTGCCCGGGTGTAAATTATAAACCACCAAGTAAGAACACCACCAA  
AGGATCCAAAGCTGGCTGCCTTGGAGAAGACTTATGACAAATACCGGGCCAACACCAA  
TTCTGTGATCCAATTCAAGGTTGCACTCCAGTACTTCAAGAACCATCTCTACTGCTCCA  
CTTAAAAAGTACCAAGACCAGGAATCGCAATAAACAGATTAGCGGCGGGCAACAAAA  
AAAATAGTAGGATTGGACATTGGAGGGTACCAAAAAGCAGACTCCTAAC AAGGGGAAC  
AGGGAACAAAGAAGCTGGAAGCTGGAGCTAGGGTAGGACCCTGAAGTCGGCTCAGG  
ACCCCCAAGACCAAATTCTCAGCACAGAGATTTATCTGCCCTAGAGAGAGAAAGGGCA  
GGGAATGAGACAAAGACAAGGGCTGGAAGGTGGTGGGGCACACCTTTAATCACAGCA  
CTCCGGGGGCAGAAGCAGGTGGATCTCTGCGCATTTTGAGGACAGCCTGGTCTACAGA  
GAGAGTTCCAGGACAGCCAGGGCTACAGAGAACTCTTATCTTAAAAAGGCAATAAGT  
TGATCTAAAATAATGTTATTTAAAGCCAGATGATAAGGTTGGTGTAGTGTGTGATCCCA  
AAGCCCAGTAACTGAAGTAGGAGGATTGAGTTCAAGGCCAGCCTGGGCTATGTAACAG  
CCCATCTTTAAATGAGTGA CTAGGGGGCTGGAGAGAGCTCAGTGCTTAAGAGCGATTA  
GGACAGAGGACCTAGATTGGCTCCCAGGACCCACATGATGAGTCACAACTTCATACCT  
GCAGTTTCAGGGAATTGGAAGCATCTGCTTACCTCCAAAGGCTCCTGCATATGAGTGGT  
GCATACATACACGCAGGCACACACATATGCACACAAAATACGCTTTAAAATAAATGAAG  
GAATGAGTGAATGGCTAAATATTAACCAAATAATTCCGATTTTATTTTGTCAAGACTGCC  
TGGCCTAGCACTCACTGTGTAAGACTGACCTCACACTCATGGCAATCCTCCTGTCTCCA  
CTTCCCAGTGCTGAGGTATGAGGTGTGAACCACAATTTCTGGCTTGGATTTTTAAAAAG  
AATTTACACACACACACATACATACACACACACTGTAGCTGTCTTCAGACACATCAGAA  
AGGGCATCAGATCCCATTACAGATGGTTGTGAGCCACCATGTGGTTGCTGGGAATTGA  
ACTCAGAACCTCTGGAAAAGCAGTCAGTGCTCTTAACTGATAAGCCATCTCTCTAGTCT  
CTAGCTTGATTTTTAACTTTGACTTTTAAATATACTTATTCATTATAATTTTTTTCTTTT  
TGAGACAGGGTTTCTCTGTGTAGCCCTGGCTGTCTGGAACCTCACTCTGTAGACCAGG  
CTGGCCTCGAACTCAGAAATCCGCCTGCCTCTGCCTCCCGAGGGCTGGGATTAAGGC  
ATGCACCACCATGCCCGGCTTATATTTGATTTTAATGGGATATTAAGATGGATGTTAAGA  
TTGTGAGCTTTCAACCCTGTCTCGGAAAACCAAAAAAAAAAAAAAAAAAGAAAGAAA  
AGATTGTGAGCCTTCATGTGGTTGTTGGGGATAGAATCTCCACTCACTCCAGTCAACCC  
TGTTCTCAGTCCCTGCTAACTCCGGCCCAAGATTTATTTATTTATAATTTATATACGT  
AAGTACACTGTAGCTGACTTCAGACACACTAGAAGAGTGTGAGATCTCATTACCGGTA  
GTTGAGTCACCATGTAGTTGCGGGGACTTGAACCTCAGGATCTTTGGAAGAGCAGTCCA  
TCCTCTTACCCTCTGAGCCATCTCGCCAGCCCAATTC AACACTCTGAACATACTTACACT  
TTATTTTTTACTTCCTGAGGTAATATTGCTCTGAGCTAGACCATAGAAAGCCAAACAC  
CAGTGGGTAAGGAGGCGAGGAATGACATGCCAGCTAGTTGTGGTGTGGGCCTTTAATC  
CCAGCCTTGAATTCAGAGATCCTCTAGCCAGGGCTAGGCAGTGAGCTCTGTTTTGTTTT  
GTTTTGTTCTGTTTTTCAGAACAAAACCAAAATCAGGGGCTGAGGAAATGGCTCAAAAG  
GTGAAGTGTTTGTACCCAAGCATGAGGACTTGAGTTCAGATTCCCAGAAGTAAGGCA  
TAGCTGCCAGTCTGTAACCTGGGCATTCTCACAGCAAATGTTAACATCCTCCATTTTG  
ACTGGGTTGTCGTTAGCATGCTCAAACACAGTCTTTTCTCTACTTCAAGATCTAGAACC

ATCTCTCCAGAAGAGAGAGAGAGAGACAGAGAGTGAGTTAGTTTCCTATGATCCAGTA  
ACACCTCTTCCCCAGGAACACAGGATGTTCTAAAAGGACATCCATTCAACTCAAAGGG  
TTCAGGGACTCCCTGAAACCCACCAGACAGACTAGGCCCCCTCTTTTCCAAGTATATTA  
GCTGTGAAGACTGCTGAGAGGCACTCTCAGACAAGTTGAGCTGCCTGAAACAGACAT  
TCTCTAACCTGTTGAGCTGTCTGCAAGTTGTACAGAGGGCTTCAAGTTTACAGCTTTTG  
TGACATGGTGAGCTTTCATGGTGCCGCTGTCTTTCGAGTCATTTGTGATCCTGCGGTAA  
CCCCTCACCCATACTTCTGTCTGTAACCCCAATAAACTCATCAGTCTGCTATACTGGA  
>B4GALNT2\_Rattus norvegicus, XM\_008768250.2

ATGATCTACACACTAAATCCCCAACCCCGAGACCGAACTCTTATCTCCCCAGCTCTCGA  
GATCAAAAATTCTAATGCCTTTTGCTTTTTCCCTGTGTCTTTTGCCAGCTCCAGGTTCCC  
ATGGCTCCTCAAGACGTTAGTCATGATCCTAGGACTTGCCACTGTTGTGTTTATGTTCA  
GAAGTTTGGCCCTTACAGCAGAGTTTGGCACCTTCAAGCCAGCGTTCCCAAAGCCTGG  
GCCGTTGACCCAGTGCTGAAACTTCTATCCGAGGAGCACCTGAGGACACTCTTTACC  
TACAGTGACATCTGGCTCTTCCCCAAAAATCAATGCGACTGTGAGTCTGGCAAACAGC  
AAATGAAATACAAGTATCAGAACGCCTATAACCAGAAGGACCTTCCGGCTGTGAACGC  
CAGAAGACAGGCAGAAATTTGAGCACTTCCAGAGGAGGGCAGGCCGGCAAACGACT  
TTCGTCTCCGTCTCCTTAAACGGAAAGGACAAACAGGGAGCTTGCGGTTACAGTGGCA  
TTCACCTTCTACATTTTTCTCTAGAGAGGAAGCTCAGAAACCTGGTGACCATCGCCACG  
AAGACTTTTCTCCGTCCCCACAAGTTTAAGATCCTGCTTCAAAGTATTCGAAAGTATTA  
CCCAGACTTAACCGTGATTGTGACTGATGACAGCAAGGAGCCCCTGGAAATTAAAGAT  
GACTACGTGGAGTATTACCCCATGCCCTTTGGGAAGGGCTGGTTTGCTGGTAGGAACC  
TGGCCATCTCACAGGTGACTACTAAATACGTCCTCTGGGTGGACGATGACTTTCTCTTC  
AGCAACAAGACCAAGATTGAGGTACTGGTGGATGTCCTGGAGAAAACCTGAACTGGAT  
GTGGTGGGCGGCAGCGTGCAGGGAACACTTTCCAGTTCAGGCTGCTGTTGGAACGG  
AGCGAGAATGGGGACTGTCTTCACCAGAGGTGGGGATCATTCCAGGCCCTCGATGGCT  
TCCCCGGATGCACGCTGGCCAGTGGCGTACGAACCTTCTTCTTGCTCACACAGAACA  
GCTCCGAAGAGTCGGTTTTGATCCGGCCCTGCAAAGAGTTGCTCACCGAGAAATTTTTTA  
TTGATGGGCTGGGGAGCCTGTTGGTGGGCTCGTGTCCGGGGGTGACTGTAGACCACCA  
AACACGAACACCATCGAAGGATCCAAAGCTGGCTGCCTTGAGATGTCTTACGCCAAA  
TACCGGACCAACACCAATTCTCAGGTCCAGTTCAAGTTAGCGCTCCACTACTTCAAGA  
ACCATCTCTACTGCGCCACTTAAAAGGCAAAGAGCCGGAAGTGCAATACGCAGATTAG  
CTGTGGACAACAAAAAATAGTAGGACTGGACATTAGGTGTGCTAAAAGCAGACTCCT  
AACAAGGGGAACAGAGAGCGAAGTAGCTGGAAGTTGGAGCCAGTGATAGGGACCCCTG  
AAGTCGGCTCAAGATGCCCCAAAGACTAAGTTCTCAGAACAGAGATTTTCTGCCCCG  
AGGGGTAAAGGGCACAGAATAAGAGACAAAGACAGGGGCTGGCCAGTGGTGGTTTAC  
ACCTTTAATTCCAGCACTCCGGAGGCAGAA

>B4GALNT2\_Sus scrofa, NM\_001244330.1

TCCGCGGAGTGGCACCACCAGCCCAGAATGTTCCGAGGCGGCGGGATTAAGGATGAC  
TTCGTACAGCCCTAGATGTCTGTCGATCCTCAAGATATTGATGGTGCTTTTGGTCCTGAG  
CGTTGGACTCTTTATGTTCCAAAGCGTGTTCCCTCGATACAGACTTCAGTCTCCTCAACT  
CACCCATCCCGTCCCCCACCCTGGATGCGCAGACGCTGAAGCTTCTACCTGAGAAACC  
CGATTTCTACGGTGAAAACGGGCTGTTCCCGAAAAACCAAGTGCCAATGTGACGCCTTC  
GGGCATCAGGAAAGCTATAACTTGGAGGATGCCTACGACCCGCAAGACCTCCCCGCAG  
TGAACCTGAGGAGACAGGCTGAGCTCGAACACTTTCAGAGGAGAGAAGGGCTCCCTC

GCCCCACGCCCCCTGCTGGCTCAGCCCAACCTCCCCTTTGGGTACCCGGTCCACGGGGT  
GGAAGTGATGCCTCTACACACCATCCCCATCCCAGGCCTCCGGTTTGAAGGACCTGAT  
GCTCCCATCTATGAGGTCACCCTGACAGCTTCTCTGGGGACACTGAACACCCTTGCTG  
ACGTCCCAGACAATGTGGTGAAGGGCAGAGGCCAGAAGCAGCTGAACATTTTGACCA  
GTAGCCGGGAGCTTTTGAATTTATCCTCCAGCATGTGACATACACGAGCACAGAGTAC  
CACCTCCACAGAGTGGATGTGGTGAAGTCTGGAGTCCAAGTCCTCAGTGGCCAAGTTTC  
CAGTGACCATCCGCTATCCTGTCATGCCCCAAGTTATATGACCCTGGACCAGAGAGGAAG  
CTCCGAGACCTGGTGACCATTGCCACCAAAACCTTCCTCCGTCCCCACAAGCTCATGA  
CCATGCTCCGGAGTGTTTCGTGAGTACTACCCAGACCTGACGGTGATCGTGGCCGATGA  
CAGCAAGGAGCCCCCTGAAAATCACTGACAGCCACGTGGAGTATTACACCATGCCATTT  
GGGAAGGGCTGGTTTGGCTGGCAGGAACCTGGCCATATCTCAGGTCAACCACCAATATG  
TGCTCTGGGTGGACGATGACTTCATCTTCAACAGCAAGACCAGGATCGAGGCGCTGGT  
GGACGTCCTAGAGAAAACGGAACCTGGACGTGGTAGGTGGCAGCGTGATTGAAAACAC  
ATTCCAGTTCAAGCTGTTGCTGGAGCAGGGGAAGAATGGCGACTGTCTCCACCAGCA  
GCCAGGATTTTTCCGGCCCCGTGGATGGCTTCCCCGACTGCGTGGTGACCAGTGGTGTT  
GTCAACTTCTTCTGGCTCACACAGAGCGACTCCAAAGAAATTGGCTTCGACCCCCGGC  
TGCAGCGAGTGGCTCACTCAGAGTTCTTTATGATGGGCTCGGGAGCCTGCTCGTGGG  
GTCCTGCCCCACAGTGATCATAGGTCACCAGCCCCATTTACCAGTGATGGACCCAGAG  
CTGGCCACCCTGGAGGGGAACCTACACCAGTTATCGGGCCAACACCGAAGCCCAGATC  
AAATTCAAGTTGGCTCTCCACTACTTCAAGAACTATCTCCAATGTGTACCTAAGGTAT  
CCGGGCATTGGAAAAGCGCTGAGCTGCCTGGTTGCAAGTATCTAAGACAGCGGATGCG  
GTGGCTGGGATACCAATATTTGAACTCCTCATAGATAAGCACTGTAATGCCAGGGAG  
CAGGGTAGGCAGGTGGGTCTGACTCCGTTACTGGAAGTACCAATAAAAGTACAGGGTC  
ATTAGAAATGGACCAGTCACTGAGGTGGGCAATGGAGACTTCATTCATAACGATTACG  
GCGGTGTTTCCATCATGGCTCAGAGGTAGCAATCCAGACTGCTATCCACGAAGATGCG  
AGTTGGATCCCTGGCCTTGCTCAGTGGGCTAAGGATCTGGCATTGCTGTGGCTGTGGCA  
TAGGCTGGCAGCTGCAGCTCTGATGCGCCCCCTAGCCTGGGAACCTTCCAGATGCTAAG  
TGTGTGGCCATAAAAAAAAAAAAAAAAAAAAAAAAAAAAAA

>B4GALNT2\_Xenopus tropicalis, XM\_002935708.4

ATATGTTTATGTACTGAGCAATTCATCTCCCAGGCTCTGGCTCTGATTATCCTCTCCTG  
CACTGCGAGTGGATTTTCATACAAACTGACAAACATGTTCTGAAGGGAAAACGCACTT  
GTTCAAGGTTTGGGCCCCGGATATGGCTGTTTGTATTTTATTTGTGATTGTAGCAGGTT  
TCGCTTTTCTGCAGCACAGGAAAAATGGGCTTATTGGCTTGACCGCCATTCATCACCCC  
AAGAGACAACTGCCACCTTTGTATCTGATGAAGAACTTATGTCCAAGTTCATCTACAA  
TGATGTCAACCTCTACCAAAAATAGACAATGTTTTTGCCCCACTGAGCCACAGAGGATTG  
AAGTTTATCATCTTAAGAAAAATCTGAATCCAAATGATGCAGACGCTATGAAAGCCAGA  
AGAAAGAAGGAGTATGAGCATTACAGCAAGAGGCAACATTTCCATGATATTCTCATAG  
CTACTCCAAACTCCCCTCTTGGCTATCCAGCCCATGGTATCCAGGTAAAGCCTCTCCATA  
CTATCCAGCTACCAGGGTTACAAGTAAATGCCGATCTTCAGAAATTATGCGGTAACATTG  
GAAGCTTCCTTGGGGACTTTTGACACCCTAGTGAATACATTGGATATAAGCAACAATGT  
AGTTTTTGGTAGAGGAGAAAAACAGTTTGTATTAAGGACATCTGACCAGAATTTACTAA  
ACCACATCCTGCGCCACATCACGTACACGAGTACAGTTTACGATATCGACAGTTTGGAT  
ATCATTAATTTACTATGGATCAACATGAAGCTAAGATTCCAGTATCGATCCGGCAGCCA  
CCAATGATACATTTATATGACCCAGGGGCAGAGCAGAAGATTGAGTCCTTGGTTACAAT

AACCACCAAGACTTTCCTGCGCTATGACAAGCTGAAAACCTCTCATAAGTAGCATTCGC  
CAGTACTACCCGGACATCAAGATCATTTGTAGCAGATGACAATAACGTCCTGAGAAGA  
TCGAGGATAAGAACGTTGAGCAGTATTTTCATGCCGTTTGGAAAGGGATGGTTCGCTGG  
AAGGAATCTTGCCGTATCTCAGGTGACCACCAAATATTTCTTTGGGTGGATGACGATT  
TCCTTTTCACTGCAGACACCAAGATAGAAAAGTTGGTAAATGTGTTGGAGTCAACCAA  
CTTAGATGTGGTTGGGGGCAATGTGAATGGCAATCATTTTAGCTTTAGACTCCTGCTAC  
AAGATGGCGGTGAGGAGGGAGACTGTCTGCACTGGAGAGGAGGGAGCTACCGAGGTA  
TTGAAGGCTTTCCAAAATGTGTGCTAACCGGAGGAGTTGTCAACTTTTTCTTGGCGCA  
CACAGACCGCTCTTAAGTGTTGGGTTTGACCCAAAGCTTCAGAGAGTGGCACATACT  
GAGTTTTTTGTTGATGCGCTGGGCCGACTACGCGTAGGATCTTGCAGTGACGTCGTTGT  
TGGACACCAAAAAAAGGACCAATCAGTTTCTGGAGCCATGGCTGAACAGGCCAAAAA  
ATATAATTCTTTTAGAACAGATACTAAAGAACAGTGAAAATGAACTCACACTTTATTA  
TTTCAAGAACCGATTAAGCTGCTTTACAAAACATTAAAACCTGTTGGAATCAGGAATGG  
AAATATATTATCTCAGGGGGCGGATGTTCAAGCCTTAGGTGAATAGATGTAGGGGTTGT  
CCGTCCTGTGGTTCAAGTTAATTAATGTGTTTCAGGTTCTAAGAGAGATTTTCATGGTAT  
ACTTACCAAATGTGATTCGAGCTATAATACATAGAACAGCTAGGATGGACTGAGTGTT  
GGGAAGAAAGTCACTCTGTTCAAGGAACACTGGATAATGTATAAAAGAATTTATCTTCC  
TTTTTGTGCATGGAGAATGGACATTTCCCTGTGAATTTTACCTGGCGGCAGGTATTATTA  
TACATAACAGAAAAAAAGTGCTTCTTTACCATGGTGTGAGACATTAACAGGGCAATATA  
TCGGCCACCAATGGGAAGATGTCTTGCCACATGGAACCTGTTGAGTCAACAGGCAACT  
GAACTCTGTTAAGTCGAGCAATAAAGCAACTCCAGCTCATAGATGAATACAAATAGGC  
AGAAGGAATATTCTGTGCACACAAGATATACTAATTAATAATGCTATTAATGTATTTTTAT  
TGTTGGAGAAAAATCTAAATCATAAATGTAAGGGCATCAATATATTTCTACATGTAATTA  
ATAGATAATTTATATCCTATAATGTGACCTATCAAAGAGTCAAATTGACGTACATGTCAAT  
AAATATTTTGTATTCACTTTGA

>B4GALNT1\_Ovis aries transcript variant X1, XM\_012176064.1

ATGTGGGAGAGGGCGAGAAGAAAGGAGGCCAGGAGACCCGAGGCCCGGGGAGTGAG  
GGGAGGGGGACGAGGGTACCTGGGGCTCCTGTACGCGAGCACCCGGGGCGCGCCGG  
GCCTCCGGGCACCTCTTGCGCTGTGGACGCCCTACAGGGCAACCCAGGCCGGAAC  
TGCTAGGTCTTGCCCCTGAGCCCAGATACGCACACATCCCGTTAGGATCAAGGAGCA  
AGTGGTGGGGCTGCTGTCTGCGAACAATTGCAGTTGTGAGTCCAGTGAGGGACGCTT  
CCACCTCCCCTTCCAGAGGCAGGTCCAAGCCTTTGACTTCACCAAGGCCTTTGACCCT  
GAGGAGCTGAGCACTGTGTCTGCCTCGAGGGAGCAGGAGTTCCAGGCCTTCCTTTCA  
AGGAGCCAGTCTGCTGCTGACCAGCTGCTCATAGCCCCTGCCAACTCCCCGCTACAGT  
ACCCCCTGCAGGGTGTGGAGGTCCAGCCCCTCAGAAGTATCTTGGTACCAGGACTGGG  
CCTGCAAGCCACTTCTGGTCAGGAGGTATACCAGGTGAACCTGACTGCCTCCTTGGGC  
ACCTGGGACGTGGCAGGGGAAGTAACTGGAGTGACTCTCACCGGAGAAGGGCAGCC  
AGATCTCACCTCACAGCCCAGGGCTGGACCAACTCAATCGGCAGCTGCAACTGGTC  
ACTTATAGCAGCCGAAGCTACCAGGCAAATACAGCAGACACAGTCCGGTTCGCCACTG  
AGGGACACGAAGCTGCCTTCACCATCCGCATAAGACACCCACCCAACCCTCGGCTGTA  
CCCACCTGGGTCTGTACCCCAGGGAGCCCAGTACAACATCAGCGCTCTGGTCAACATT  
GCCACTAAGACCTTCCTTCGTTACAATCGGCTACGGGCACTCATCGCCAGCATCCGCCG  
CTTCTACCCAACGGTCACAGTGGTAATCGCCGATGACAGCGACAAGCCAGAGAGCGTT  
AGAGGTCCCCACATCGAGCACTATCTCATGCCTTTTGGCAAGGGCTGGTTCGCAGGCC



GGAACCTGGCCATATCCCAAGTAACCACCAAGTACGTGCTGTGGGTGGACGATGACTT  
CGTCTTCACGGCGCGGACTCGACTAGAGAGGCTTGTGGACGTGTTGGAGCGGACGCC  
GCTGGACCTGGTGGGGGGCGCGGTGCGCGAAATCTCCGGCTTCGCCACCACCTACCG  
GCAGGCGCTGAGCGTGGAGCCTGGTGCGCCAGGCCGGGGAACTGCCTCCGGCAGA  
AGCGCGGCTTCCACCACGAGCTCGTCGGCTTCCCGGGGTGCGTGGTCACCGACGGCG  
TGGTCAACTTCTTCCTGGCGCGCACTGACAAGGTGCGCGAGGTTCGGCTTTGACCCGCG  
CCTCAGCCGCGTGGCGCACCTGGAATTCTTCCTGGATGGACTTGGTTCTCTTCAAGTG  
GGCTCCTGCTCAGACGTGGTTGTGGATCACGCATCCAAGTTGAAGTTGCCTTGGACCT  
CAAGGGATGCGAAGGCAGAGACTTATGCTCGGTACCGTTACCCGGGATCACTGGACGA  
GAGTCAGGTGGCCAAACATCGTCTGCTCTTCTTCAAACACCGGCTCCAGTGCATGACC  
TCAGAGTGATGGCCACTTGGGGCCTTTCAGTTGTCAGACTGGGCCTGCCTCCTTGTCC  
CTGCCAGGAATTCCTAGCAAACCCACCAGCCAGTGACCACTCCACTGACTGTCCCAG  
TCTCCTTCAGAACTTGATCCCAAACAGGGGCTTGTCTGCTGTCACCTCCTTTCTGC  
AAGTGCCCAAGGGGCATGATGGAGCCATAACTTGTCCACAGCCAGTGCCAAGTCCTCC  
CCCCAACCCCTTCCCCTAGGGCAGGAAGTGGGGGGTTGCTTTTCAAGTGCCAAAGAG  
CCCATAGGGGGACTCTAAAAACCTAAAGCAGAAATACTCTCATCTCCTTGGTACTAAGG  
GGTTGGGGAAGCCCCAGTATATAGTCCCAGGGCTGTGCCCTATCTCTGGATCCAGGA  
CTCTGTGCAGTGGCTGCAGCCTCACCCCCATGGAGAGAATGGAGTTGGAATGGGGGCT  
GGTGAACATACAGGGGAAAGCCGTTTTTAGCTGTGTCTTGCAGTGCTTTGGGAGTGG  
AGGAAGGGGCAC

>B4GALNT1\_Ovis aries transcript variant X2, XM\_012159415.2

ACCTGCATCTCTTAACCTCTCCCGCCTCTGCAGGCAGGTTCTTTACCACTAGTGCCACC  
TGGAAGCTCCTCAATTTCCCTACTTTCCTCACTTTTCTTTCTCAAAGGACGTGAGCCT  
TCTACTAATATGCTCTTCAATATCTTTCAGTCTTTCCTAACACTCCTAGATTCCTCCTG  
GTTCTACCCAAGACCCAGTTCCAAATCCATTCACATTTTATAGGTTTTTATTATGGCAG  
CACTTCATTTCTAGTATTTGCACAATCCTAGAAGCTAAAACCTACACTCAGGAGCTGAC  
TATATATGCTATTGTTTATTTTGCTTAACAGCTTTGGATATCATTCAGTATCAGTAGATATA  
GATTAATCCAGTGTCCCATTTGTCTGACTGAATCATATTTAAAAATTTAACTTTCTAATAT  
TTAAGATTTAAATGATTAATATTTTATTTTTTGATTAATATTTTAATTGTTAATAGATTGGC  
CAATTGCTCTAAGCTGGGTCCATTAACACTCACAAACAGTATGGTAGTGAATTTCC  
TCAAATACTTGATCACTTGTGTTAGCAAACCTCTTTGACCTTTACTAAATTGCTAAACAA  
AAACCAATTCATTTGTTACTCTAATTTGGATTTTACTTATTATGAATAGGGTCAAGTGTACA  
TTCATTTGTTTGAAAAGCCATTTTACTTTTTCCCTCAACTGTCTAATCACAAATTTTGC  
CCATTTGGGGGTGACTGATAATTTTTCTATGTATGTTTTATAGCTCTTAAGAAAAATA  
GGCCTTGATCTGTCTTACATGTTGCACATATTTTTTACAGTTTGTCAATTTCTCAAGTTT  
GTTTATAGAAATTTCTTCACCCAAGCTTATTATATAGGCAAATCTATTAATACGTCCTTTT  
ATCTTACTTAGAGATATCTTCCCCACTCCAAGATCATAAAAAAGAACAAAACAACTCC  
ATGAATTAATTTGACTACTCTTTGTGGTTACATTTTAAATAATAAGATATTTGATACATCTG  
GAATTTATTTTGGTGTAAAGAGGGTGAGAATCTCACTTCTCTCCAGCCGATTAGTCATT  
TCTTTGTACACAGTTCATCCAATAATCCAACCGTCCCTCTCCCATGCCCCCACATTTTCA  
TTATGTTTTACATTTCCCTATTATATCTTTTTTCCCTATTAAATTGTGACATCTTTTATTAGAA  
CCATGGGACCACAGGACATAGGGCAGCAGCAAGAATCCAGCTACAGCTAAGGTAGTAC  
AGGTCTGCAGCTTGCACGCCTAAGTACAACCAATCTAGGCACTGTGTGGGGTTTCTTTC  
CTTCCGCAAGTCTGCAACAAGGAGCAGTCAGAAGAAGCAGGCCCTTGAATTAAGT

TGTTTGTTACATCATTGAGTATTCGTTAGATAACTGGGGTATGCGGGGGCTGGAGGGCG  
GGAGAGGCGAGGCTAGGAGGGAGGCTGTCAACTTGTCTTTGTTAGCTAGGCAGTCTTT  
ATTTTCCAGTCTTGTCTGGGTTCCTTTATCTCACCCTAAGTATCCAAATCTTCCTTGAAA  
TGGGGTTACAGGGCGTCCCCACCCCATCACTTGCCAAACCCTTATCGCCTGTCTGGCC  
TACAGTCTCGATGGAAAGACGGAAAATAGGAAAAGAGTGATTGGATCGCGGTGGGGC  
GGGGGAGACGGCCAGGGTTCGGAGGCAAGGGCTGGCGGGGAGGGAGGAGGCGTG  
AAGAGGACCTTAGTGCTTCGCTGGCTTCGCGCCCCCGCAGTGTCTCCGCGCCACCA  
GAAGGCGCCCCAGCGCTCTCATCTCGGCGCGTAGCCTGACGCTCCTCCGCAACCGGC  
ACCCGAGCCGAGCCGCCGGGATCTGAAAAGCCGGGCGGCGGCCGGGACTTTCCCGGC  
CCGGCAAGTGGGACAGGGTCCCAGGGAACCCCGGATTTGTTTCTGGGATTGGCGTGC  
GGCGGTTTCTCGACTCCGATCCCCCAACCCCGCAGGAAACGCCCAGAACCACCCAG  
CGCGGTGGTCTACAAAGCCCGGAGAGTCCAAAGGCGGGCGGGTTCGTGCGCGCTCGG  
GAGGCAGGAGGACTCCCCCTCACTCAGATTCACGCCCCGGTCCCCAATCAGGACGCCT  
CCAGCCCCATGAGGACTCTCAGGCCAGGGCTGAGAGCCTGGCACAGCCCTGACCGAA  
ATCTTGACGCGCCTTAAAGCGTTAAGACAGGATGCGGCTGGGCCGCCGGGCCCTCGG  
TGTGCTCGTCTGCTGCTCGCCTGCGCCTCGCTGGGGCTCCTGTACGCGAGCACCCGG  
GGCGCGCCGGGCCTCCGGGCACCTCTTGCCTGTGGACGCCCTACAGGGCAACCCC  
AGGCCGGAAGTCTAGGTCTTGCCCCTGAGCCCAGATACGCACACATCCCGGTTAGGA  
TCAAGGAGCAAGTGGTGGGGCTGCTGTCTGCGAACAATTGCAGTTGTGAGTCCAGTG  
AGGGACGCCTCCACCTCCCCTTCCAGAGGCAGGTCCAAGCCTTTGACTTCACCAAGGC  
CTTTGACCCTGAGGAGCTGAGCACTGTGTCTGCCTCGAGGGAGCAGGAGTTCCAGGC  
CTTCCTTTCAAGGAGCCAGTCTGCTGCTGACCAGCTGCTCATAGCCCCTGCCAACTCCC  
CGCTACAGTACCCCTGCAGGGTGTGGAGGTCCAGCCCCTCAGAAAGTATCTTGGTACC  
AGGACTGGGCCTGCAAGCCACTTCTGGTCAGGAGGTATACCAGGTGAACCTGACTGCC  
TCCTTGGGCACCTGGGACGTGGCAGGGGAAGTAACTGGAGTGACTCTCACCGGAGAA  
GGGCAGCCAGATCTCACCTCACAGCCCAGGGCTGGACCAACTCAATCGGCAGCTG  
CAACTGGTCACTTATAGCAGCCGAAGCTACCAGGCAAAATACAGCAGACACAGTCCGGT  
TCGCCACTGAGGGACACGAAGCTGCCTTACCATCCGCATAAGACACCCACCCAACCC  
TCGGCTGTACCCACCTGGGTCTGTACCCAGGGAGGTGAGACTGCCAGTACAACATC  
AGCGCTCTGGTCAACATTGCCACTAAGACCTTCCTTCGTTACAATCGGCTACGGGCACT  
CATCGCCAGCATCCGCCGCTTCTACCCAACGGTCAACAGTGGTAATCGCCGATGACAGC  
GACAAGCCAGAGAGCGTTAGAGGTCCCCACATCGAGCACTATCTCATGCCTTTTGCA  
AGGGCTGGTTTCGAGGCCCGGAACCTGGCCATATCCCAAGTAACCACCAAGTACGTGCT  
GTGGGTGGACGATGACTTCGTCTTACGGCGCGGACTCGACTAGAGAGGCTTGTGGAC  
GTGTTGGAGCGGACGCCGCTGGACCTGGTGGGGGGCGCGGTGCGCGAAATCTCCGGC  
TTCGCCACCACCTACCGGCAGCTGCTGAGCGTGGAGCCTGGTGCGCCAGGCCGGGGG  
AACTGCCTCCGGCAGAAGCGCGGCTTCCACCACGAGCTCGTCGGCTTCCCGGGGTGC  
GTGGTCACCGACGGCGTGGTCAACTTCTTCTGGCGCGCACTGACAAGGTGCGCGAG  
GTTGGCTTTGACCCGCGCCTCAGCCGCGTGGCGCACCTGGAATCTTCTTGGATGGAC  
TTGGTTCTCTTCAAGTGGGCTCCTGCTCAGACGTGGTTGTGGATCACGCATCCAAGTTG  
AAGTTGCCTTGGACCTCAAGGGATGCGAAGGCAGAGACTTATGCTCGGTACCGTTACC  
CGGGATCACTGGACGAGAGTCAGGTGGCCAAACATCGTCTGCTCTTCTTCAAACACCG  
GCTCCAGTGCATGACCTCAGAGTGATGGCCACTTGGGGCCTTTCAGTTGTCAGACTGG  
GCCTGCCTCCTTGTCCCTGCCAGGAATTCCTAGCAAACCCACCAGCCAGTGACCACT

CCACTGACTGTCCCAGTCTCCTTCAGAACTTGATCCCAAACAGGGGCTTGTCTGGTG  
TCACTCCTCCTTTCTGCAAGTGCCCAGGGGCATGATGGAGCCATAACTTGTCCCACAGC  
CAGTGCCAAGTCCTCCCCCAACCCCTTCCCCTAGGGCAGGAAGTGGGGGGTTGCTTT  
TCAAGTGCCAAAGAGCCCATAGGGGGACTCTAAAAACCTAAAGCAGAAATACTCTCCT  
CTCATCTCCTTGGTACTAAGGGGTGGGGAAGCCCCAGTATATAGTCCCAGGGCTGTG  
CCCCTATCTCTGGATCCAGGACTCTGTGCAGTGGCTGCAGCCTCACCCCCATGGAGAG  
AATGGAGTTGGAATGGGGGCTGGTGAACATACAGGGGAAAGCCGTT

>B4GALNT1\_Ovis aries transcript variant X3, XM\_012159413.2

ACCTGCATCTCTTAACCTCTCCCGCCTCTGCAGGCAGGTTCTTTACCACTAGTGCCACC  
TGGAAGCTCCTCAATTTCCCTACTTTCCTCACTTTTCTTTCTCAAAGGACGTGAGCCT  
TCTACTAATATGCTCTTCAATATCTTTCAGTCTTTCCTAACACTCCTAGATTCCTTCCTG  
GTTCTACCCAAGACCCAGTTCCAAATCCATTCACATTTTATAGGTTTTATATGGCAG  
CACTTCATTTCTAGTATTTGCACAATCCTAGAAGCTAAAACCTACACTCAGGAGCTGAC  
TATATATGCTATTGTTTATTTTGCTTAACAGCTTTGGATATCATTCAGTATCAGTAGATATA  
GATTAATCCAGTGTCCCATTTGTCTGACTGAATCATATTTAAAAATTTAACTTTCTAATAT  
TTAAGATTTAAATGATTAATATTTTATTTTTTGATTAATATTTTAATTGTTAATAGATTGGC  
CAATTGCTCTAAGCTGGGTCCATTAACACTCACAAACGATGGTAGTGACTATTTCC  
TCAAATACTTGATCACTTGTGTTAGCAAACCTTTGACCTTTACTAAATTGCTAAACAA  
AAACCATTTCAATTGTTACTCTAATTTGGATTTTACTTATTATGAATAGGGTCAAGTGTACA  
TTCATTTGTTTGAAAAGCCATTTTACTTTTTCCCTCAACTGTCTAATCACAATTTTTGC  
CCATTTGGGGGTGACTGATAATTTTTTCTATTGATGTTTTATAGCTCTTAAGAAAAATA  
GGCCTTGATCTGTCTTACATGTTGCACATATTTTTTTCACAGTTTGTCATTTCTCAAGTTT  
GTTTATAGAAATTTCTTCACCCAAGCTTATTATATAGGCAAATCTATTAATACGTCCTTTT  
ATCTTACTTAGAGATATCTTCCCCACTCCAAGATCATAAAAAAGAACAAAACAACTCC  
ATGAATTATTTGACTACTCTTTGTGGTTACATTTTAAATAATAAGATATTTGATACATCTG  
GAATTTATTTTGGTGTAAGAGGGGTGAGAATCTCACTTTCTCTCCAGCCGATTAGTCATT  
TCTTTGTACACAGTTCATCCAATAATCCAACCGTCCCTCTCCCATGCCCCCACATTTTCA  
TTATGTTTTACATTTCTTATTATATCTTTTTTCCCTATTAAATTGTGACATCTTTTATTAGAA  
CCATGGGACCACAGGACATAGGGCAGCAGCAAGAATCCAGCTACAGCTAAGGTAGTAC  
AGGTCTGCAGCTTGCACGCCTAAGTACAACCAATCTAGGCACTGTGTGGGGTTTCTTTC  
CTTCCGCAAGTCTGCAACAAGGAGCAGTCAGAAGAAGCAGGCCCTTGAATTACTGAG  
TGTTTGTTACATCATTGAGTATTCGTTAGATAACTGGGGTATGCGGGGGCTGGAGGGCG  
GGAGAGGCGAGGCTAGGAGGGAGGCTGTCAACTTGTCTTTGTTAGCTAGGCAGTCTTT  
ATTTTCCAGTCTTGTCTGGGTTCCTTTATCTCACCTAAGTATCCAAATCTTCCTTGAAA  
TGGGGTTACAGGGCGTCCCCACCCCATCACTTGCCAAACCCTTATCGCCTGTCCTGGCC  
TACAGTCTCGATGGAAGACGGAATAAGGAAAAGAGTGATTGGATCGCGGTGGGGC  
GGGGGAGACGGCCAGGGTTCGGAGGCAAAGGGCTGGCGGGGAGGGAGGAGGCGTG  
AAGAGGACCTTAGTGCTTCGCTGGCTTCGCGCCCCCGCAGTGTCTCCGCGCCACCA  
GAAGGCGCCCCAGCGCTCTCATCTCGGCGCGTAGCCTGACGCTCCTCCGCAACCGGC  
ACCCGAGCCGAGCCGCCGGGATCTGAAAAGCCGGGCGGCGGCCGGGACTTTCCCGGC  
CCGGCAAGTGGGACAGGGTCCCAGGGAACCCCGGATTTGTTTCTGGGATTGGCGTGC  
GGCGGTTTCTCGACTCCGATCCCCCAACCCCGCAGGAAACGCCCAGAACCACCCAG  
CGCGGTGGTCTACAAAGCCCGGAGAGTCCAAAGCGGGCGGGGTGCTGCGCGCTCGG  
GAGGCAGGAGGACTCCCCCTCACTCAGATTCACGCCCGGCTCCCCAATCAGGACGCCT

CCAGCCCCATGAGGACTCTCAGGCCAGGGCTGAGAGCCTGGCACAGCCCTGACCGAA  
ATCTTGACGCGCCTTAAAGCGTTAAGACAGGATGCGGCTGGGCCCGCGGGCCCTCGG  
TGTGCTCGTCCTGCTGCTCGCCTGCGCCTCGCTGGGGCTCCTGTACGCGAGCACCCGG  
GGCGCGCCGGGCCTCCGGGCACCTCTTGCGCTGTGGACGCCCTACAGGGCAACCCC  
AGGCCGGAAGTGTAGGTCTTGCCCTGAGCCCAGATACGCACACATCCCGGTTAGGA  
TCAAGGAGCAAGTGGTGGGGCTGCTGTCTGCGAACAATTGCAGTTGTGAGTCCAGTG  
AGGGACGCCTCCACCTCCCCTTCCAGAGGCAGGTCCAAGCCTTTGACTTCACCAAGGC  
CTTTGACCCTGAGGAGCTGAGCACTGTGTCTGCCTCGAGGGAGCAGGAGTTCCAGGC  
CTTCCTTTCAAGGAGCCAGTCTGCTGCTGACCAGCTGCTCATAGCCCCTGCCAACTCCC  
CGCTACAGTACCCCTGCAGGGTGTGGAGGTCCAGCCCCTCAGAAAGTATCTTGGTACC  
AGGACTGGGCCTGCAAGCCACTTCTGGTCAGGAGGTATACCAGGTGAACCTGACTGCC  
TCCTTGGGCACCTGGGACGTGGCAGGGGAAGTAACTGGAGTGACTCTCACCGGAGAA  
GGGCAGCCAGATCTCACCTCACAGCCCAGGGCTGGACCAACTCAATCGGCAGCTG  
CAACTGGTCACTTATAGCAGCCGAAGCTACCAGGCAAATACAGCAGACACAGTCCGGT  
TCGCCACTGAGGGACACGAAGCTGCCTTACCATCCGCATAAGACACCCACCCAACCC  
TCGGCTGTACCCACCTGGGTCTGTACCCAGGGAGCCCAGTACAACATCAGCGCTCTG  
GTCACCAATTGCCACTAAGACCTTCCTTCGTTACAATCGGCTACGGGCACTCATCGCCAG  
CATCCGCCGCTTCTACCCAACGGTCACAGTGGTAATCGCCGATGACAGCGACAAGCCA  
GAGAGCGTTAGAGGTCCCCACATCGAGCACTATCTCATGCCTTTTGGCAAGGGCTGGT  
TCGCAGGCCGGAACCTGGCCATATCCCAAGTAACCACCAAGTACGTGCTGTGGGTGGA  
CGATGACTTCGTCTTCACGGCGCGGACTCGACTAGAGAGGCTTGTGGACGTGTTGGAG  
CGGACGCCGCTGGACCTGGTGGGGGGCGCGGTGCGCGAAATCTCCGGCTTCGCCACC  
ACCTACCGGCAGCTGCTGAGCGTGGAGCCTGGTGCGCCAGGCCGGGGGAAGTGCCTC  
CGGCAGAAGCGCGGCTTCCACCACGAGCTCGTCGGCTTCCCGGGGTGCGTGGTCACC  
GACGGCGTGGTCAACTTCTTCCTGGCGCGCACTGACAAGGTGCGCGAGGTTGGCTTTG  
ACCCGCGCCTCAGCCGCGTGGCGCACCTGGAATTCTTCCTGGATGGACTTGGTTCTCTT  
CAAGTGGGCTCCTGCTCAGACGTGGTTGTGGATCACGCATCCAAGTTGAAGTTGCCTT  
GGACCTCAAGGGATGCGAAGGCAGAGACTTATGCTCGGTACCGTTACCCGGGATCACT  
GGACGAGAGTCAGGTGGCCAAACATCGTCTGCTCTTCTTCAAACACCGGCTCCAGTGC  
ATGACCTCAGAGTGATGGCCACTTGGGGCCTTTTCAAGTTGTCAGACTGGGCCTGCCTCC  
TTGTCCCTGCCAGGAATTCCTAGCAAACCCACCAGCCAGTGACCACTCCACTGACTG  
TCCCAGTCTCCTTCAGAACTTGATCCCAAACAGGGGCTTGTCTGGTGTCACTCCTCCT  
TTCTGCAAGTGCCAGGGGCATGATGGAGCCATAACTTGTCCCACAGCCAGTGCCAAG  
TCCTCCCCCAACCCCTTCCCCTAGGGCAGGAAGTGGGGGGTTGCTTTTCAAGTGCCA  
AAGAGCCCATAGGGGGACTCTAAAAACCTAAAGCAGAAATACTCTCCTCTCATCTCCT  
TGGTACTAAGGGGTTGGGGAAGCCCCAGTATATAGTCCCAGGGCTGTGCCCTATCTC  
TGGATCCAGGACTCTGTGCAGTGGCTGCAGCCTCACCCCCATGGAGAGAATGGAGTTG  
GAATGGGGGCTGGTGAACATACAGGGGAAAGCCGTT
