# Supplementary figures and images for: Molecular Cloning of the B4GALNT2 Gene and Its Single Nucleotide Polymorphisms Association with Litter Size in Small Tail Han Sheep
Source: MDPI journal article supplement (doi:10.3390/ani8100160), 2018-09-20

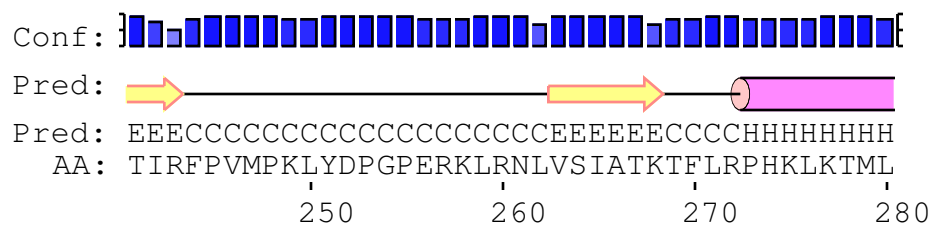

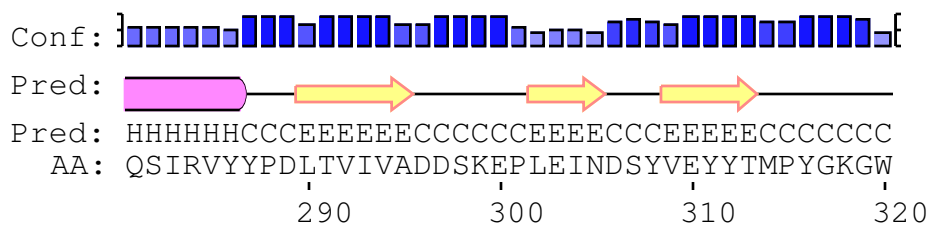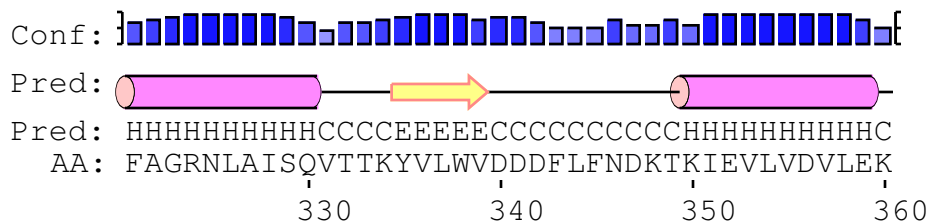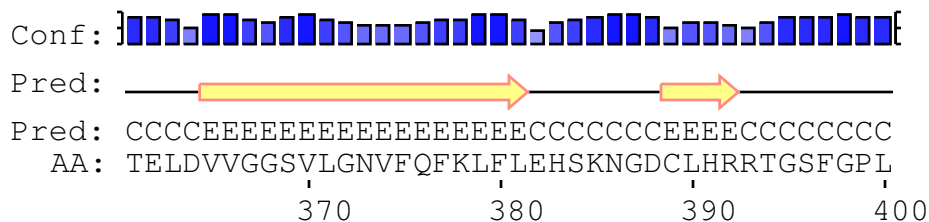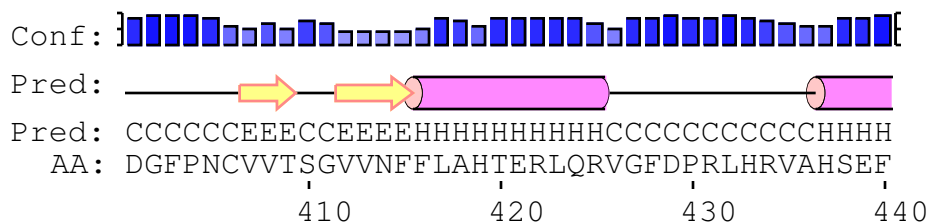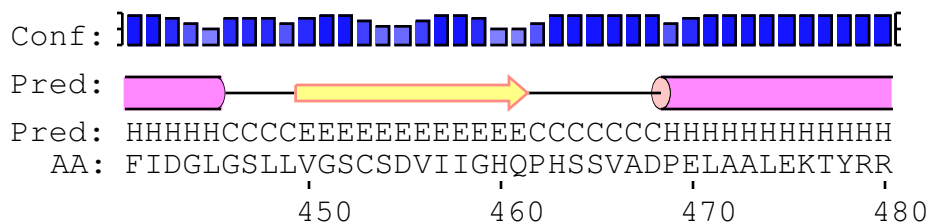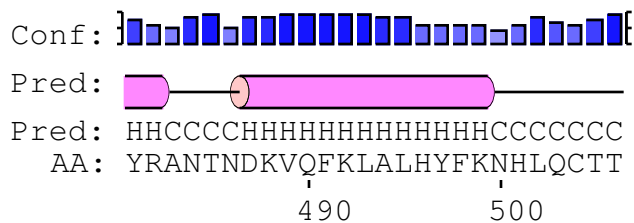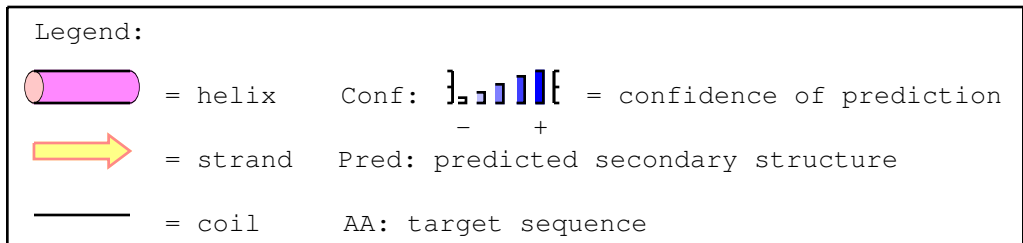

Supplement: s1 [file s1]
